# Supplementary material for: Synthesis of antimicrobial block copolymers bearing immobilized bacteriostatic groups
Source: Royal Society of Chemistry journal article supplement (doi:10.1039/c6py00553e), 2016-01-01
Supplement: c6py00553e1.pdf [file c6py00553e1.pdf]

## Synthesis of antimicrobial block copolymers bearing immobilized bacteriostatic groups

N. D. Koromilas,<sup>a</sup> G. Ch. Lainioti,<sup>a,b</sup> G. Vasilopoulos,<sup>c</sup> A. Vantarakis<sup>c</sup> and J. K. Kallitsis<sup>\*,a,b</sup>

<sup>a</sup> Department of Chemistry, University of Patras, GR-26504, Patras, Greece.

<sup>b</sup> FORTH/ICE-HT, Stadiou Str., P.O. Box 1414, GR-26504, Rio-Patras, Greece.

<sup>c</sup> Environmental Microbiology, Department of Public Health, Medical School, University of Patras, Greece.

### SI-1 Synthesis and characterization of PMMA-*b*-PVBCHAM<sub>x</sub> copolymers

The chemical structure of PMMA-*b*-PVBCHAM<sub>x</sub> copolymers was verified through ATR-FTIR spectroscopy. As shown in Figure S1, the characteristic bands of PMMA(1) macro-initiator and PVBCHAM appeared also in the spectra of PMMA(1)-*b*-PVBCHAM<sub>65</sub> copolymer, verifying the success of the polymerization. More specifically, the absorbance peaks of VBCHAM unit at 1610 cm<sup>-1</sup> and 1510 cm<sup>-1</sup>, attributed to the aromatic C=C stretching, as well as the peaks at 1460 cm<sup>-1</sup> and 1482 cm<sup>-1</sup>, assigned to the -CH<sub>3</sub> bending of the amines and the C-N bond respectively, appear in all copolymers' spectra. The aforementioned peaks, in combination with the band at 1730 cm<sup>-1</sup>, assigned to the carbonyl stretching, verifying the existence of both VBCHAM and MMA units in the copolymer.

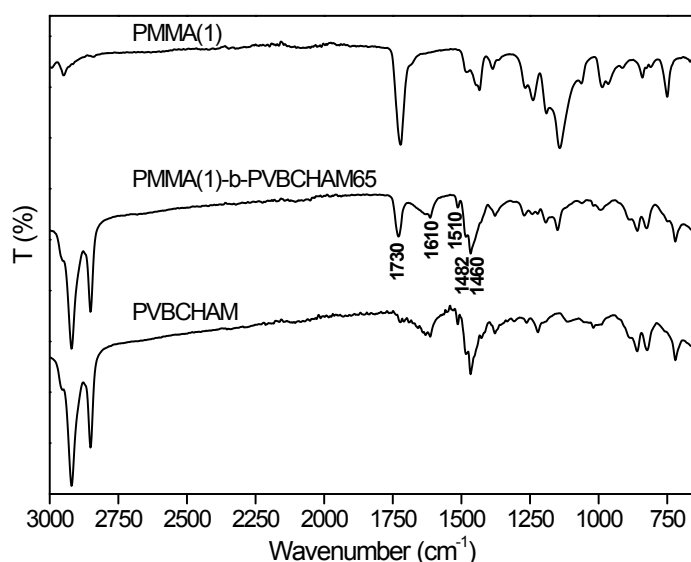

Fig. S1 ATR-FTIR spectra of the diblock copolymer PMMA(1)-*b*-PVBCHAM<sub>65</sub>, the macro-initiator PMMA(1) and the homopolymer PVBCHAM.

**SI-2 Size Exclusion Chromatography (SEC) measurements of PtBA macro-initiator**

SEC measurements were conducted for the PtBA macro-initiator, where the estimated  $M_n$ ,  $M_w$  and the polydispersity were 10379, 11638 and 1.12 respectively, indicating the controlled polymerization of the monomer. An example of the spectra obtained from SEC is shown in **Figure S2**.

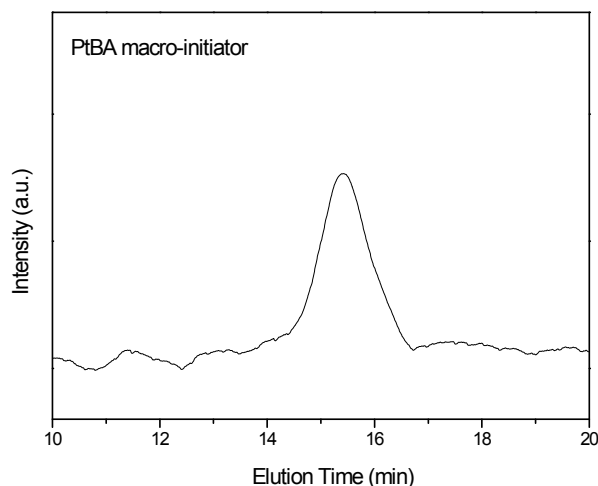

Fig. S2 Size exclusion chromatography for PtBA macro-initiator using  $\text{CHCl}_3$  as eluent.

**SI-3 Synthesis and characterization of VBCHAM and SSAmC<sub>16</sub> diblock copolymers**

For the synthesis of SSAmC<sub>16</sub> and VBCHAM diblock copolymers, two different synthetic routes were followed as it is analytically described in the main manuscript. Briefly, in the first case, PVBCHAM macro-initiators were initially prepared via ATRP followed by the polymerization of SSAmC<sub>16</sub>, whereas in the second synthetic route, due to difficulties in the direct polymerization of SSAmC<sub>16</sub> via ATRP, PSSAmC<sub>16</sub> macro-initiators were synthesized after ATRP of SSNa monomer followed by reaction with AmC<sub>16</sub>. Subsequently, VBCHAM was polymerized, using PSSAmC<sub>16</sub> as macro-initiator.

The chemical structure of this new class of block copolymers was verified through ATR-FTIR spectroscopy. As shown in Figure S3 (first synthetic route) for the PVBCHAM(1)10-b-PSSAmC<sub>16</sub> copolymer, the ATR-FTIR spectra resembles mostly with the spectra of the homopolymer PSSAmC<sub>16</sub>, due to the high molar percentage of the SSAmC<sub>16</sub> unit in the copolymer. More specifically, the peak at 1037  $\text{cm}^{-1}$  attributed to the S=O stretching vibrations, while the peak at 1120  $\text{cm}^{-1}$  assigned to the S-O stretching vibration.<sup>1</sup> Despite the low molar percentage of VBCHAM unit in the copolymer, the peaks at 1465 and 1484  $\text{cm}^{-1}$  assigned to the  $\text{CH}_3$  bending of the amines and the C-N formation bond respectively. Finally, the peak at 750  $\text{cm}^{-1}$ , proved also the existence of the VBCHAM moiety.

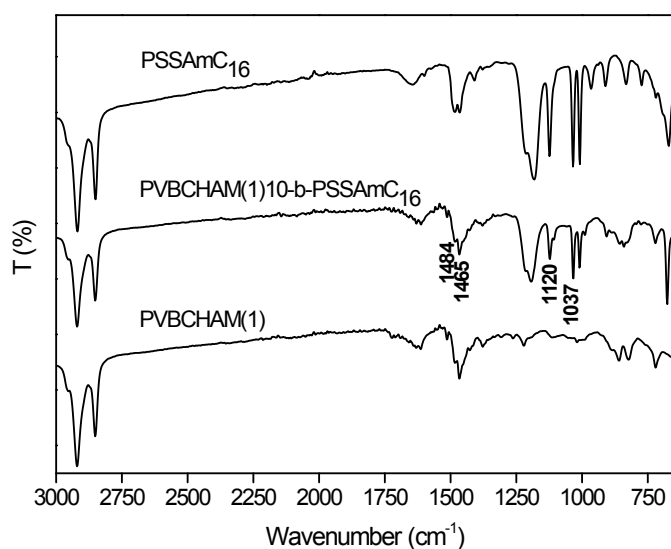

Fig. S3 ATR-FTIR spectra of the diblock copolymer PVBCHAM(1)10-b-PSSAmC<sub>16</sub>, the macro-initiator PVBCHAM(1) and the homopolymer PSSAmC<sub>16</sub>.

The chemical structure of the copolymers synthesized according to the second synthetic route was also verified with ATR-FTIR (Figure S4). The peaks correspondence was described above.

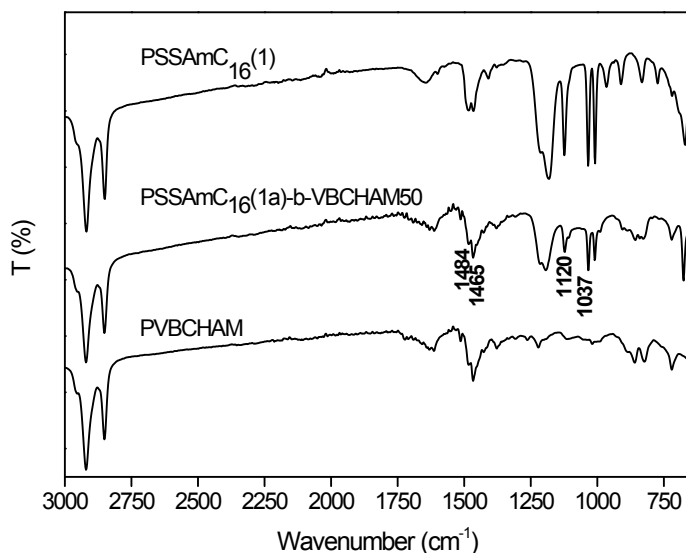

Fig. S4 ATR-FTIR spectra of the diblock copolymer PSSAmC<sub>16</sub>(1a)-b-PVBCHAM50, the macro-initiator PSSAmC<sub>16</sub>(1) and the homopolymer PVBCHAM.

## Notes and references

- 1 J. Luo, Y. Chen, Q. Ma, R. Liu and X. Liu, *RSC Adv.*, 2013, **3**, 17866.
